# Supplementary material for: WNT signaling in pre-granulosa cells is required for ovarian folliculogenesis and female fertility
Source: Oxford University Press journal article supplement (doi:10.1242/dev.198846), 2021-04-24
Supplement: dev198846supp.pdf [file dev198846supp.pdf]

## Supplementary Information

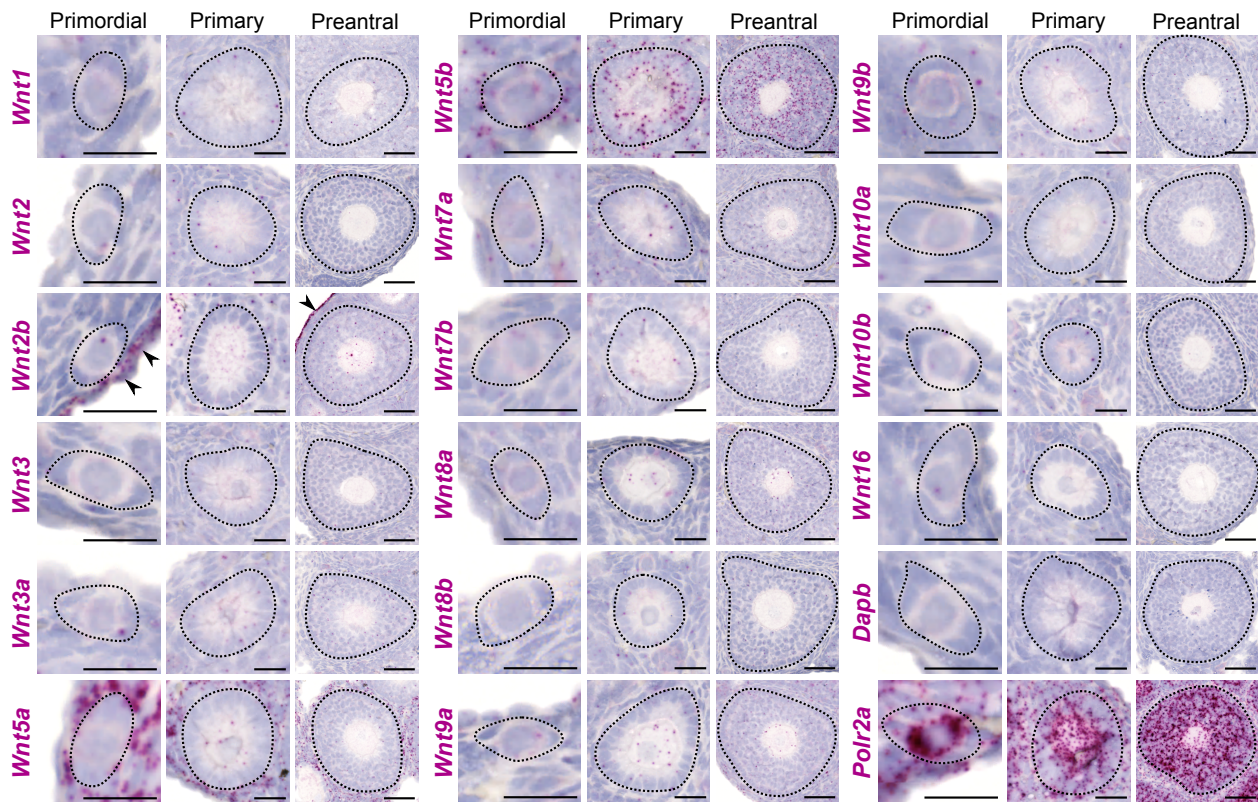

**Figure S1. Expression pattern of Wnt ligands in mouse ovary.**

In situ hybridization analysis of *Wnt1*, *Wnt2*, *Wnt2b*, *Wnt3*, *Wnt3a*, *Wnt5a*, *Wnt5b*, *Wnt7a*, *Wnt7b*, *Wnt8a*, *Wnt8b*, *Wnt9a*, *Wnt9b*, *Wnt10a*, *Wnt10b*, *Wnt16*, *Dapb* (negative control), and *Polr2a* (positive control) mRNAs (red) in ovaries of 3-week-old WT mice. Follicles were classified as primordial, primary, or preantral (dotted lines). Arrowheads indicate the ovarian epithelium. Scale bar, 50  $\mu$ m (rightmost panels) or 20  $\mu$ m (other panels).

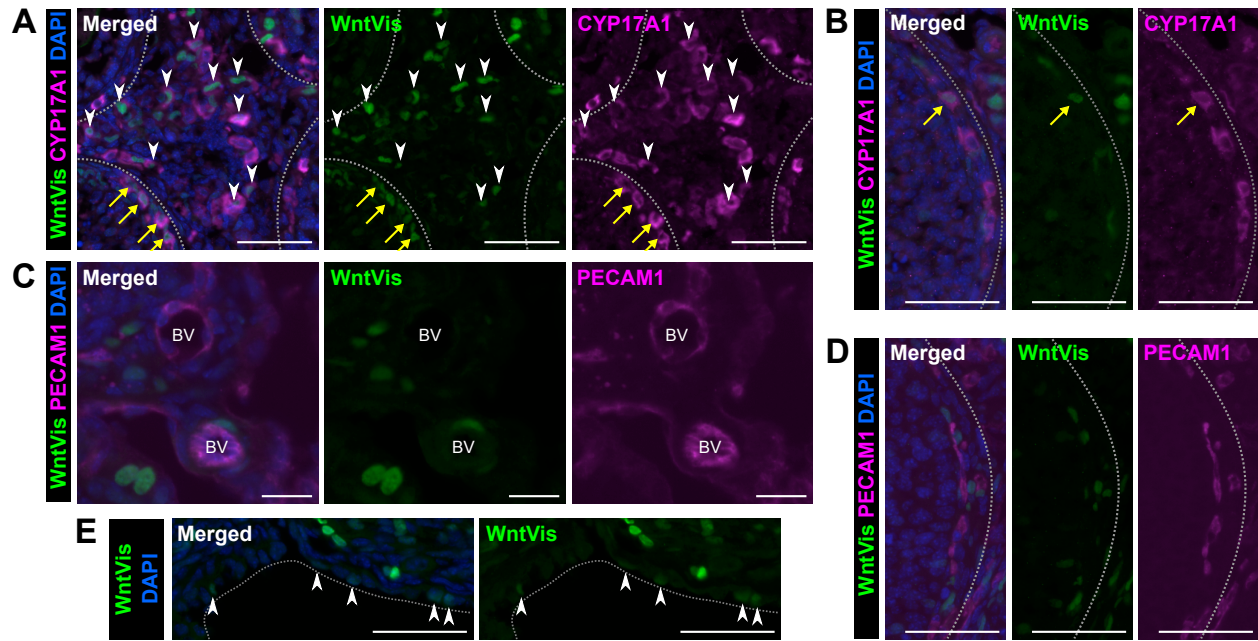

**Figure S2. Interstitial cells, Theca cells, and ovarian epithelium receive Wnt signals.**

(A, B) Immunofluorescence staining of WntVis (green) and CYP17A1 (magenta) in stromal (A) or Theca cell (B) regions of ovaries from 4-week-old *R26-WntVis* mice. Nuclei were counterstained with DAPI (blue). White arrowheads indicate interstitial cells which are double-positive for WntVis and CYP17A1. Yellow arrows indicate Theca cells which are double-positive for WntVis and CYP17A1. Gray dotted lines mark the boundaries of antral follicles. Scale bar, 50  $\mu$ m.

(C, D) Immunofluorescence staining of WntVis (green) and PECAM1 (magenta) in blood vessels (C) or capillary vessels around follicles (D) of ovaries from 4-week-old *R26-WntVis* mice. Nuclei were counterstained with DAPI (blue). Gray dotted lines mark the boundaries of antral follicles. BV, blood vessels. Scale bar, 20  $\mu$ m (C) or 50  $\mu$ m (D).

(E) Immunofluorescence staining of WntVis (green) in ovarian epithelium of 4-week-old *R26-WntVis* mice. Nuclei were counterstained with DAPI (blue). The gray dotted lines mark the boundaries of ovaries. Scale bar, 50  $\mu$ m. Arrowheads indicate WntVis-positive ovarian epithelium.



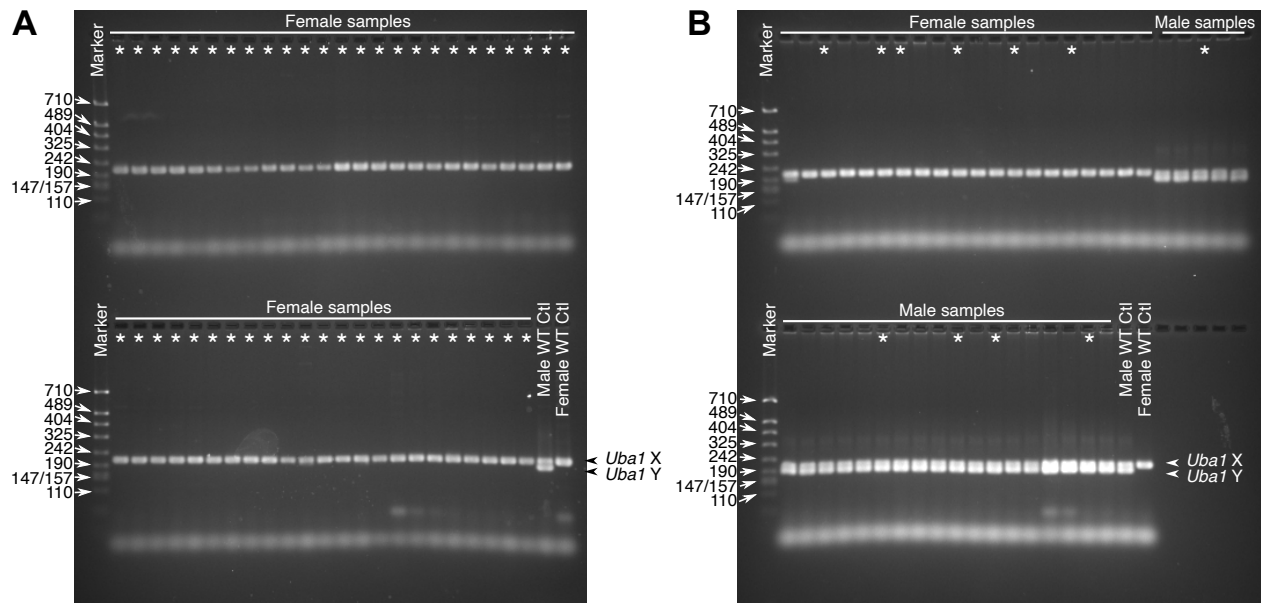

**Figure S3. Sex genotyping of *Wls* cKO mice.**

(A, B) Sex genotyping was performed on collected female *Wls* cKO mouse samples (A) or female/male mice obtained from a single in vitro fertilization (B). PCR-amplified products using primer sets for *Uba1* gene were analyzed by agarose gel electrophoresis with full images. Female product, single band of 217 bp; male samples, distinct bands of 198 and 217 bp. Each lane represents one independent sample. Asterisks indicate *Wls* cKO mice. Male or female wildtype (WT) mice were used as controls.

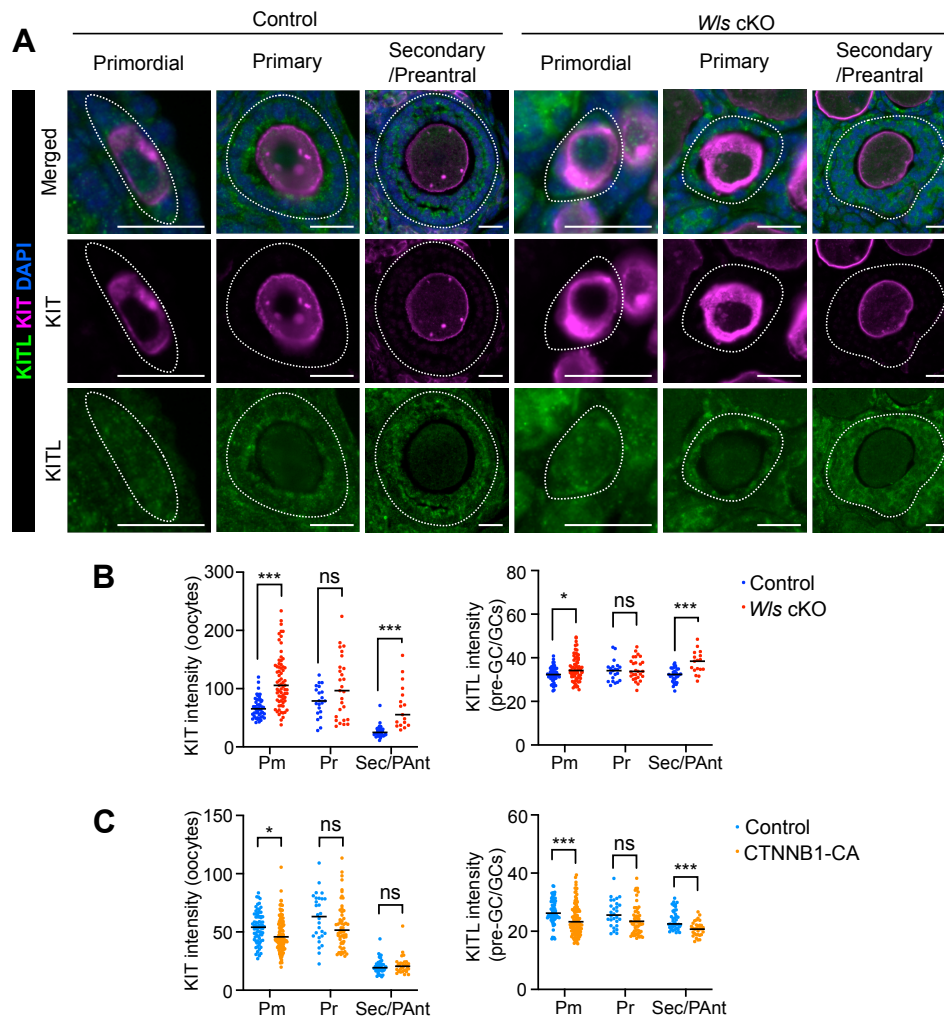

**Figure S4. KIT and KITL expression in *Wls* cKO or CTNNB1-CA mice.**

(A) Immunofluorescence staining of KITL (green) and KIT (magenta) in the ovaries of 3-week-old *Wls* cKO or littermate control mice. Nuclei were counterstained with DAPI (blue). Follicles are demarcated with white dotted lines. Scale bar, 20  $\mu$ m.

(B, C) Fluorescence intensities of KIT in oocytes and KITL in pre-GC/GCs in the ovaries of *Wls* cKO (B), tamoxifen-treated CTNNB1-CA (C) or littermate control mice at 3 weeks of age. Follicles were morphologically classified (Pm, primordial; Pr, primary; Sec/PAnT, secondary/preantral). Horizontal lines represent the median. ns, not significant, \* $P < 0.05$ , \*\*\* $P < 0.001$  (unpaired multiple  $t$  tests with Holm-Sidak correction). ( $n=110$  follicles from five control mice;  $n=113$  follicles from five *Wls* cKO mice (B).  $n=146$  follicles from five control mice;  $n=203$  follicles from five CTNNB1-CA mice (C).) The intensities from *Wls* cKO (B) and CTNNB1-CA (C) mice are not directly comparable because the data were obtained from different experiments.

|                | Primary       |               |               |             |             | Secondary/Preantral |              |               |             |               |
|----------------|---------------|---------------|---------------|-------------|-------------|---------------------|--------------|---------------|-------------|---------------|
|                | squamous      | s/c           | cuboidal      | c/c         | columnar    | squamous            | s/c          | cuboidal      | c/c         | columnar      |
| Control        | 6<br>(6.6%)   | 8<br>(8.8%)   | 12<br>(13.2%) | 5<br>(5.5%) | 8<br>(8.8%) | 0<br>(0.0%)         | 1<br>(1.1%)  | 7<br>(7.7%)   | 0<br>(0.0%) | 44<br>(48.4%) |
| <i>Wls</i> cKO | 16<br>(26.2%) | 12<br>(19.7%) | 7<br>(11.5%)  | 1<br>(1.6%) | 0<br>(0.0%) | 0<br>(0.0%)         | 8<br>(13.1%) | 17<br>(27.9%) | 0<br>(0.0%) | 0<br>(0.0%)   |

**Table S1. Contingency table showing the phenotypic differences of developing follicles classified by GC morphology in 2-week-old *Wls* cKO (n = 61) and control (n = 91) mice.**

|                    | Primary       |               |               |              |             | Secondary/Preantral |               |               |             |               |
|--------------------|---------------|---------------|---------------|--------------|-------------|---------------------|---------------|---------------|-------------|---------------|
|                    | squamous      | s/c           | cuboidal      | c/c          | columnar    | squamous            | s/c           | cuboidal      | c/c         | columnar      |
| Control            | 2<br>(2.4%)   | 4<br>(4.9%)   | 15<br>(18.3%) | 5<br>(6.1%)  | 4<br>(4.9%) | 0<br>(0.0%)         | 0<br>(0.0%)   | 0<br>(0.0%)   | 1<br>(1.2%) | 51<br>(62.2%) |
| PN- <i>Wls</i> cKO | 42<br>(35.6%) | 35<br>(29.7%) | 12<br>(10.2%) | 2<br>(1.69%) | 1<br>(0.9%) | 2<br>(1.69%)        | 11<br>(9.32%) | 12<br>(10.2%) | 1<br>(0.9%) | 0<br>(0.0%)   |

**Table S2. Contingency table showing the phenotypic differences of developing follicles classified by GC morphology in 3-week-old tamoxifen-treated PN-*Wls* cKO (n = 118) and control (n = 82) mice.**
